# Supplementary material
Source: ML conference proceedings conference paper supplement (https://openreview.net/forum?id=wNaXMRWPmq)
Supplement: supplementary_material [file attachment]

# Q-MoE: Connector for MLLMs with Text-Driven Routing

## Supplementary Materials

### A TRAINING

#### A.1 Router

**PRE-Router** is the most general version of Router under the Mixture of Expert setting. The input of Expert FFN is  $x \in \mathbb{R}^{N_q \times D}$ . It consists of a simple linear layer ( $W_o \in \mathbb{R}^{D \times E}$ ) that maps dimension from dimension of hidden states  $D$  to number of experts  $E$ . Then it follows by a softmax operation to output probability values.

$$g(x)_i = (\text{softmax}(W_o x + \epsilon))_i \quad (1)$$

**POST-Router**, specifically operates on the outputs of the Expert FFNs  $f(x)_i$ . We first reduce the dimension of  $f(x)_i$  from  $N_q \times D$  to  $1 \times D$  through mean pooling. Then we introduce a route vector  $W_p \in \mathbb{R}^{D \times 1}$  that, given any  $f_i(x)$ , determine whether and how much each expert is activated. Then, we apply a softmax function to all concatenated  $W_p f_i(x)$ , and output the activation probability score of each expert. The motivation behind this design is to make decision of FFN activation based on the processing results of the certain FFN in a posterior manner.

$$m(x) = \text{meanPool}(x), m(x) \in \mathbb{R}^{1 \times D} \quad (2)$$

$$g(x)_i = (\text{softmax}([W_p m(f_0(x)) + \epsilon, \dots, W_p m(f_E(x)) + \epsilon]))_i \quad (3)$$

**CLS-Router** operates on the embedding of the [CLS] token from the Q-MoE text input. The Router defines an weight matrix  $W_c \in \mathbb{R}^{D \times 1}$ , and then outputs probability through softmax. This approach aims to leverage textual information to assist in the selection of Expert FFNs.

$$g(x)_i = (\text{softmax}([W_p h_{CLS} + \epsilon, \dots, W_p h_{CLS} + \epsilon]))_i \quad (4)$$

#### A.2 Training and Hyper-parameters

Details are shown in Table 1.

| Config                 | Parameter                                      |
|------------------------|------------------------------------------------|
| Max training steps     | 50k                                            |
| Batch size per GPU     | 32                                             |
| Optimizer              | AdamW                                          |
| Beta1                  | 0.9                                            |
| Beta2                  | 0.999                                          |
| Weight decay           | 0.05                                           |
| Image resolution       | 224 × 224                                      |
| Learning rate          | 1e-6 to 5e-5 in first 600 steps(linear warmup) |
| Learning rate schedule | cosine                                         |
| GPU                    | 4 × Nvidia A100 (80G)                          |

Table 1: Hyper-parameters

### B DATA

#### B.1 Datasets

In this section, we show the statistic of training datasets and evaluation datasets. Firstly, for the fine-tuning related datasets, we show how each dataset distributes and what ratio we use for sample balancing in Table 3. For the evaluation datasets, we illustrate the metric of 6 datasets that evolve in fine-tuning and 4 datasets that evolve in zero-shot performance evaluation.

| Dataset | Train  | Validation | Test   | Metric    | SampleRatio |
|---------|--------|------------|--------|-----------|-------------|
| GQA     | 943000 | 12578      | 12578  | VQA-score | 10          |
| OKVQA   | 9009   | 5046       | 5046   | VQA-score | 1           |
| VQAv2   | 658104 | 214354     | 447793 | VQA-score | 9           |
| AOKVQA  | 17056  | 1145       | 1145   | Accuracy  | 2           |
| COCOCap | 414113 | 5000       | 5000   | CIDEr     | 7           |
| TextCap | 109765 | 15830      | 16445  | CIDEr     | 4           |

Table 2: Datasets For Fine-tuning Related Statistic.

| Dataset                  | Test | Metric   |
|--------------------------|------|----------|
| VizWiz                   | 4319 | Accuracy |
| HatefulMemes             | 500  | Accuracy |
| Visual Spatial Reasoning | 1222 | Accuracy |
| NoCaps                   | 4500 | CIDEr    |

Table 3: Datasets For Zero-shot Evaluation Related Statistic.

#### B.2 Instruction List

We list three types of instruction format for Generative QA, Multi-choice VQA and Image Captioning respectively in Table 4.

### C EXPERIMENTS

#### C.1 Ablation Experiment Results

In this section, we give full results on all fine-tuning datasets, including the ablation results of main components in Table 5, routing in Table 6, expert setup and combination in Table 7 and training tasks in Table 8.

| Task             | Dataset        | Instruction Format                                                                                                                                                                                 |
|------------------|----------------|----------------------------------------------------------------------------------------------------------------------------------------------------------------------------------------------------|
| Generative QA    | GQA?           | {QUESTION},                                                                                                                                                                                        |
|                  | VQAv2?         | Q: {QUESTION} A: ,                                                                                                                                                                                 |
|                  | OKVQA?         | Based on the image, respond to this question with a short answer: {QUESTION},<br>{QUESTION} A short answer to the question is ,<br>Question: {QUESTION} Short answer: ,                            |
| Multi-choice VQA | AOKVQA?        | {QUESTION} Choose from {CANDIDATES}. ,<br>Q: {QUESTION} Multi Choices: {CANDIDATES} A: ,                                                                                                           |
|                  |                | question: {QUESTION} Multi Choices: {CANDIDATES} Answer: ,<br>"{QUESTION} Choose one from the following possible answers: {CANDIDATES}. ",<br>{QUESTION} Choose from {CANDIDATES}. The answer is , |
| Image Captioning | COCO Captions? | A photo of ,                                                                                                                                                                                       |
|                  | TextCap?       | An image that shows ,<br>Write a short description for the image. ,                                                                                                                                |
|                  |                | Write a description for the photo.,<br>A short image description: ,                                                                                                                                |

Table 4: Instruction Templates.

| Components   | GQA    | OKVQA  | VQAv2  | AOKVQA | COCO Caption | Text Caption | VQA Average | Caption Average | AVERAGE |
|--------------|--------|--------|--------|--------|--------------|--------------|-------------|-----------------|---------|
| Q-MoE        | 63.611 | 58.640 | 79.560 | 75.022 | 139.215      | 108.082      | 69.208      | 123.648         | 87.355  |
| \- CROSS     | 63.563 | 58.280 | 79.470 | 74.585 | 139.137      | 108.000      | 68.975      | 123.568         | 87.173  |
| \-Path-Optim | 63.778 | 57.750 | 79.600 | 73.799 | 139.522      | 106.964      | 68.732      | 123.243         | 86.902  |

Table 5: Complete Results for Ablation of Main Components.

| routing | Strategy | GQA    | OKVQA  | VQAv2  | AOKVQA | COCO Caption | Text Caption | VQA Average | Caption Average | AVERAGE |
|---------|----------|--------|--------|--------|--------|--------------|--------------|-------------|-----------------|---------|
| -       | -        | 62.466 | 57.520 | 78.180 | 75.197 | 138.595      | 106.606      | 68.341      | 15.000          | 86.427  |
| PRE     | -        | 62.824 | 57.250 | 78.430 | 74.672 | 138.890      | 106.381      | 68.294      | 122.636         | 86.408  |
| CLS     | Path     | 62.673 | 57.440 | 78.430 | 75.459 | 138.195      | 105.424      | 68.500      | 121.810         | 86.270  |
| POST    | Optim    | 63.659 | 57.820 | 79.530 | 72.227 | 139.433      | 106.847      | 68.309      | 123.140         | 86.586  |
| CROSS   | -        | 63.651 | 58.500 | 79.340 | 72.926 | 139.789      | 108.519      | 68.604      | 124.154         | 87.121  |

Table 6: Complete Results for Ablation of routing.

| Expert Combination             | GQA           | OKVQA         | VQAv2         | AOKVOA        | COCOCap        | TextCap        | VQA Average   | Caption Average | AVERAGE       |
|--------------------------------|---------------|---------------|---------------|---------------|----------------|----------------|---------------|-----------------|---------------|
| task expert=1                  | 62.466        | 57.520        | 78.180        | <b>75.197</b> | 138.595        | 106.606        | 68.341        | 122.601         | 86.427        |
| task expert=3                  | <b>63.722</b> | 58.500        | 79.240        | 74.672        | 139.228        | 107.729        | <u>69.034</u> | 123.479         | 87.182        |
| task expert=4                  | 63.651        | 58.500        | <b>79.340</b> | 72.926        | <b>139.789</b> | <u>108.519</u> | 68.604        | <b>124.154</b>  | 87.121        |
| task expert=3 + general expert | <u>63.611</u> | <b>58.640</b> | <u>79.560</u> | <u>75.022</u> | 139.215        | 108.082        | <b>69.208</b> | 123.648         | <b>87.355</b> |
| task expert=7 + general expert | 63.555        | 58.320        | <b>79.570</b> | 73.624        | <u>139.229</u> | <b>108.687</b> | 68.767        | <u>123.958</u>  | 87.164        |

Table 7: Complete Results for Expert Setup and Combination..

| Tasks    | GQA    | OKVQA | VQAv2 | AOKVOA | COCOCap | TextCap | AVERAGE      |
|----------|--------|-------|-------|--------|---------|---------|--------------|
| VQA      | 63.45  | 56.68 | 76.88 |        |         |         | 65.67        |
|          | 63.61  | 58.50 | 79.81 |        |         |         | 67.31(+1.64) |
| +AOKVQA  | 63.28  | 57.99 | 79.21 | 72.49  |         |         | 68.24        |
|          | 63.52  | 58.72 | 79.00 | 74.32  |         |         | 68.89(+0.65) |
| +COCOCap | 63.21  | 59.04 | 79.37 | 73.10  | 139.77  |         | 82.90        |
|          | 63.74  | 58.36 | 79.53 | 74.93  | 139.14  |         | 82.99(+0.09) |
| +TextCap | 62.466 | 57.52 | 78.18 | 75.20  | 138.60  | 106.61  | 86.43        |
|          | 63.61  | 58.64 | 79.56 | 75.02  | 139.21  | 108.08  | 87.35(+0.94) |

Table 8: Complete Results for Training Tasks.
